# Supplementary material
Source: PubMed Central journal article supplement (PMC1885545)
Supplement: NIHMS15440-supplement-01.pdf [file NIHMS15440-supplement-01.pdf]

**Supplemental Data Table 1: Affymetrix ID, Gene Title, Gene Symbol, and the averages for all RMA normalized values**

| <b>Gene Symbol</b> | <b>Gene Title</b>                                                                | <b>P6 B6 Average</b> | <b>P10 B6 Average</b> | <b>P14 B6 Average</b> | <b>P17 B6 Average</b> | <b>P21 B6 Average</b> | <b>P6 RD Average</b> | <b>P10 RD Average</b> | <b>P14 RD Average</b> | <b>P17 RD Average</b> | <b>P21 RD Average</b> |
|--------------------|----------------------------------------------------------------------------------|----------------------|-----------------------|-----------------------|-----------------------|-----------------------|----------------------|-----------------------|-----------------------|-----------------------|-----------------------|
| Stat3              | signal transducer and activator of transcription 3                               | 8.8057               | 8.8479                | 8.8023                | 9.0372                | 9.1331                | 8.9547               | 9.1223                | 9.2123                | 9.0325                | 9.2248                |
| Cd180              | CD180 antigen                                                                    | 4.3027               | 4.1725                | 4.3477                | 4.1712                | 4.4751                | 4.2835               | 4.2230                | 4.2397                | 4.4258                | 4.3263                |
| Irf1               | interferon regulatory factor 1                                                   | 6.9920               | 7.0747                | 7.1842                | 7.0342                | 7.0078                | 7.0199               | 7.2171                | 7.2933                | 7.5093                | 7.4124                |
| Prkcd              | protein kinase C, delta                                                          | 7.1852               | 7.2229                | 7.1334                | 7.0718                | 7.2053                | 7.2597               | 7.1977                | 7.3310                | 7.3045                | 7.2314                |
| Fcgr1              | Fc receptor, IgG, high affinity I                                                | 5.9583               | 5.8958                | 5.9281                | 5.8830                | 5.9273                | 6.0908               | 6.0721                | 6.4205                | 6.0942                | 6.0757                |
| Map2k3             | mitogen activated protein kinase kinase 3                                        | 7.5262               | 7.3622                | 7.4294                | 7.4307                | 7.5818                | 7.5485               | 7.5079                | 7.6922                | 7.6133                | 7.6688                |
| Ap3d1              | adaptor-related protein complex 3, delta 1 subunit                               | 9.5136               | 9.4626                | 9.1222                | 9.5305                | 9.4612                | 9.5422               | 9.6060                | 9.6649                | 9.7744                | 9.7936                |
| Dbnl               | drebrin-like                                                                     | 9.0665               | 8.9701                | 8.8335                | 8.8507                | 8.8262                | 9.1720               | 9.0298                | 8.9574                | 9.1115                | 8.9672                |
| Hmgb3              | high mobility group box 3                                                        | 11.0380              | 10.5187               | 10.0389               | 9.3855                | 9.1529                | 10.8876              | 10.4985               | 9.9210                | 9.9780                | 9.5784                |
| Cd1d1              | CD1d1 antigen                                                                    | 7.3958               | 5.9330                | 5.1418                | 5.1059                | 5.0060                | 6.9888               | 5.6810                | 5.5722                | 5.9021                | 5.7119                |
| Pcgf4              | polycomb group ring finger 4                                                     | 10.3148              | 10.2407               | 9.8675                | 10.0258               | 9.8320                | 10.1260              | 10.1502               | 9.5905                | 9.8069                | 9.8704                |
| Cdkn1a             | cyclin-dependent kinase inhibitor 1A (P21)                                       | 7.6918               | 7.6152                | 7.6893                | 7.4376                | 7.2925                | 7.9280               | 7.8178                | 7.9417                | 7.7039                | 7.7162                |
| Lyzs               | lysozyme                                                                         | 5.4493               | 5.3441                | 5.0721                | 4.5228                | 4.9026                | 5.3943               | 6.0427                | 6.9584                | 5.4767                | 5.0044                |
| Rac1               | RAS-related C3 botulinum substrate 1                                             | 11.2526              | 11.2713               | 11.0672               | 11.1060               | 10.9979               | 11.2343              | 11.3430               | 11.3571               | 11.5060               | 11.4747               |
| C1qa               | complement component 1, q subcomponent, alpha polypeptide                        | 7.4530               | 7.9485                | 7.7444                | 7.1021                | 7.4594                | 7.4795               | 8.5253                | 9.6869                | 8.1296                | 8.0348                |
| C1qg               | complement component 1, q subcomponent, gamma polypeptide                        | 8.8933               | 9.2189                | 9.1213                | 8.5728                | 8.6612                | 8.8817               | 9.7392                | 10.7275               | 9.5942                | 9.2271                |
| C1qb               | complement component 1, q subcomponent, beta polypeptide                         | 6.9072               | 7.1890                | 7.0321                | 5.9982                | 6.3149                | 6.6597               | 7.9016                | 9.2660                | 7.7993                | 7.3454                |
| Ly86               | lymphocyte antigen 86                                                            | 6.7781               | 7.0758                | 6.9831                | 6.7089                | 6.6532                | 6.6548               | 7.2143                | 8.1769                | 7.5152                | 7.2451                |
| Tnfsf12            | tumor necrosis factor (ligand) superfamily, member 12                            | 8.2365               | 8.5759                | 9.1893                | 9.8117                | 9.8173                | 8.0988               | 8.8750                | 8.6766                | 8.4332                | 8.3451                |
| Cxcl12             | chemokine (C-X-C motif) ligand 12                                                | 4.7311               | 4.5860                | 4.6268                | 4.8369                | 5.0129                | 4.7142               | 4.7301                | 5.0152                | 4.9561                | 5.4458                |
| Impdh1             | inosine 5'-phosphate dehydrogenase 1                                             | 9.4381               | 9.6599                | 9.7250                | 10.0900               | 10.6221               | 9.4228               | 10.0536               | 9.1687                | 8.5362                | 8.5184                |
| Pla2g7             | phospholipase A2, group VII (platelet-activating factor acetylhydrolase, plasma) | 7.9042               | 8.4892                | 8.4960                | 8.7320                | 8.6230                | 7.7489               | 8.2530                | 7.3038                | 7.1040                | 6.9798                |
| Lpin1              | lipin 1                                                                          | 8.2062               | 8.1671                | 7.8931                | 8.7952                | 8.6750                | 8.2138               | 8.6013                | 8.0026                | 8.1512                | 8.1029                |
| Stab1              | stabilin 1                                                                       | 6.5094               | 6.6632                | 6.3910                | 6.3269                | 6.3826                | 6.6268               | 6.6240                | 6.7299                | 6.2879                | 6.2538                |

|           |                                                                                                  |        |         |         |         |         |        |         |         |         |         |
|-----------|--------------------------------------------------------------------------------------------------|--------|---------|---------|---------|---------|--------|---------|---------|---------|---------|
| Cfhrb_4/2 | complement factor H-related protein B                                                            | 3.7533 | 3.8067  | 3.8650  | 3.8223  | 3.8349  | 3.7714 | 3.8664  | 4.1289  | 4.1217  | 4.3279  |
| Cfh       | complement component factor h                                                                    | 3.9669 | 4.3310  | 4.6344  | 4.6138  | 4.7655  | 4.0002 | 4.4554  | 4.8557  | 5.4914  | 5.1827  |
| Chst2     | carbohydrate sulfotransferase 2                                                                  | 6.5712 | 7.3037  | 7.5216  | 7.9145  | 7.7484  | 6.4860 | 7.9293  | 8.5095  | 8.6635  | 8.5249  |
| Il11ra1   | interleukin 11 receptor, alpha chain 1 ///<br>interleukin 11 receptor, alpha chain 2             | 6.9695 | 7.2102  | 7.1749  | 7.3296  | 7.5134  | 6.8876 | 7.3066  | 7.5640  | 7.5512  | 7.6601  |
| Tollip    | toll interacting protein                                                                         | 8.2076 | 8.4242  | 8.6279  | 8.9480  | 8.9732  | 8.1980 | 8.7671  | 8.9171  | 9.0944  | 9.0139  |
| Cxcl14    | chemokine (C-X-C motif) ligand 14                                                                | 7.0044 | 7.1914  | 7.7601  | 8.0830  | 8.0128  | 6.9737 | 7.7588  | 7.8639  | 8.3929  | 8.4828  |
| Ccl9      | chemokine (C-C motif) ligand 9                                                                   | 6.2479 | 6.5553  | 6.8619  | 6.9612  | 7.0248  | 6.3634 | 6.5266  | 7.7541  | 7.8306  | 7.9600  |
| Gbp2      | guanylate nucleotide binding protein 2                                                           | 5.0481 | 5.2196  | 5.4079  | 5.4265  | 5.5580  | 5.2304 | 5.4829  | 6.1784  | 5.9391  | 6.4238  |
| H2-D1     | histocompatibility 2, D region locus 1                                                           | 7.7606 | 7.8631  | 8.0775  | 8.1453  | 8.3592  | 7.9318 | 8.2973  | 9.1855  | 8.8945  | 8.9672  |
| H2-K1     | histocompatibility 2, K1, K region                                                               | 7.7162 | 7.9070  | 8.0528  | 8.2747  | 8.4920  | 7.8605 | 8.3640  | 9.2970  | 9.1453  | 9.0658  |
| Ifit3     | interferon-induced protein with<br>tetra-ricopeptide repeats 3                                   | 5.2422 | 5.1768  | 5.4741  | 5.7940  | 6.0543  | 5.3041 | 6.2520  | 7.2863  | 7.6036  | 7.4851  |
| H2-D1     | histocompatibility 2, D region locus 1                                                           | 4.4698 | 4.5842  | 4.5589  | 4.9636  | 5.2039  | 4.5997 | 4.8176  | 5.3276  | 5.4346  | 5.5056  |
| Gbp4      | guanylate nucleotide binding protein 4                                                           | 5.4378 | 5.6126  | 5.7736  | 5.9844  | 6.0750  | 5.4040 | 5.8886  | 6.3396  | 6.4599  | 6.1970  |
| Prkcq     | protein kinase C, theta                                                                          | 6.5499 | 6.8395  | 6.9520  | 6.8312  | 6.8615  | 6.7707 | 6.7312  | 7.3939  | 7.1846  | 7.2026  |
| Serping1  | serine (or cysteine) peptidase inhibitor,<br>clade G, member 1                                   | 7.6376 | 7.2856  | 7.2117  | 7.2661  | 7.4792  | 7.6154 | 7.5474  | 8.2670  | 8.3488  | 8.5499  |
| Ifit1     | interferon-induced protein with<br>tetra-ricopeptide repeats 1                                   | 4.0322 | 4.2299  | 4.4056  | 4.4975  | 4.8265  | 4.3413 | 4.5752  | 5.2396  | 5.3086  | 5.2483  |
| Isgf3g    | interferon dependent positive acting<br>transcription factor 3 gamma                             | 7.2959 | 7.1389  | 7.2831  | 7.5629  | 7.6451  | 7.3598 | 7.3379  | 7.8126  | 8.0092  | 8.0480  |
| Ifit2     | interferon-induced protein with<br>tetra-ricopeptide repeats 2                                   | 5.4635 | 5.9386  | 5.7859  | 5.7625  | 5.8581  | 5.3740 | 5.9819  | 6.2707  | 6.8498  | 6.5942  |
| Tac1      | tachykinin 1                                                                                     | 7.4497 | 7.4814  | 7.4685  | 7.6262  | 7.0438  | 7.1394 | 7.5085  | 7.9100  | 8.1555  | 8.4611  |
| B2m       | beta-2 microglobulin                                                                             | 8.3837 | 8.6340  | 8.6391  | 8.6530  | 8.5400  | 8.1253 | 9.0729  | 10.2357 | 10.0736 | 9.6179  |
| C4        | complement component 4 (within H-2S)<br>/// sex-limited protein                                  | 5.8050 | 5.8130  | 5.8667  | 6.1074  | 6.3010  | 5.7377 | 5.9820  | 7.4066  | 7.2177  | 7.4475  |
| C3        | complement component 3                                                                           | 5.7556 | 5.7796  | 5.7645  | 5.5261  | 5.8437  | 5.3532 | 5.6605  | 5.8918  | 5.7595  | 5.8818  |
| Il18      | interleukin 18                                                                                   | 5.9239 | 6.1272  | 6.2917  | 6.4142  | 6.4532  | 5.9508 | 6.0848  | 6.4956  | 6.6659  | 6.8736  |
| Dfy       | Duffy blood group                                                                                | 8.6556 | 8.7742  | 8.5218  | 9.0514  | 8.9381  | 8.5536 | 8.9707  | 9.2206  | 9.5008  | 9.3053  |
| Slc3a2    | solute carrier family 3 (activators of<br>dibasic and neutral amino acid transport),<br>member 2 | 9.9151 | 10.3127 | 10.2354 | 10.2412 | 10.2060 | 9.8727 | 10.6581 | 10.5766 | 10.4805 | 10.5734 |

|          |                                                                                                                                      |        |        |        |        |        |        |         |        |        |        |
|----------|--------------------------------------------------------------------------------------------------------------------------------------|--------|--------|--------|--------|--------|--------|---------|--------|--------|--------|
| H2-T10   | histocompatibility 2, T region locus 10 ///<br>histocompatibility 2, T region locus 22 ///<br>histocompatibility 2, T region locus 9 | 5.5560 | 5.9110 | 6.1864 | 5.9781 | 6.0566 | 5.5494 | 6.2593  | 6.7336 | 6.4307 | 6.3410 |
| Egr1     | early growth response 1                                                                                                              | 7.8337 | 7.8740 | 8.5227 | 8.4792 | 8.4596 | 7.8861 | 10.2860 | 9.8101 | 8.9445 | 8.8606 |
| Cebpb    | CCAAT/enhancer binding protein<br>(C/EBP), beta                                                                                      | 4.8649 | 5.0524 | 5.3374 | 5.2742 | 5.3610 | 5.0235 | 6.2350  | 6.9861 | 6.3134 | 6.0659 |
| H2-T22   | histocompatibility 2, T region locus 10 ///<br>histocompatibility 2, T region locus 22 ///<br>histocompatibility 2, T region locus 9 | 6.3331 | 6.4317 | 6.6975 | 6.4787 | 6.5437 | 6.4952 | 6.5963  | 7.1149 | 6.8666 | 6.8443 |
| Bst1     | bone marrow stromal cell antigen 1                                                                                                   | 3.6542 | 3.7802 | 3.9370 | 3.8941 | 4.2140 | 3.9323 | 3.7133  | 3.9596 | 3.7412 | 3.9143 |
| Tacstd2  | tumor-associated calcium signal<br>transducer 2                                                                                      | 6.6740 | 6.7480 | 6.8315 | 6.7332 | 6.6758 | 6.8152 | 7.3197  | 6.7721 | 7.0219 | 6.6226 |
| C1r      | complement component 1, r<br>subcomponent                                                                                            | 4.8743 | 5.0357 | 4.9160 | 5.1075 | 5.1900 | 5.0426 | 4.8418  | 5.1241 | 5.0805 | 5.2485 |
| Traf3ip2 | Traf3 interacting protein 2                                                                                                          | 5.6727 | 6.0152 | 5.9630 | 5.8512 | 5.8281 | 5.7286 | 5.8748  | 6.0913 | 5.9582 | 6.1144 |
| Prkca    | protein kinase C, alpha                                                                                                              | 7.2985 | 7.7656 | 7.6746 | 7.6558 | 7.7361 | 7.3080 | 7.9275  | 7.7002 | 7.6023 | 7.8734 |
