# Supplementary material
Source: PubMed Central journal article supplement (PMC1885545)
Supplement: NIHMS15440-supplement-02.pdf [file NIHMS15440-supplement-02.pdf]

**Supplemental Data 2. *p*-values based on ANOVA using a pairwise comparison for each time point**

| <b>Gene Symbol</b> | <b>P6 p-value</b> | <b>P10 p-value</b> | <b>P14 p-value</b> | <b>P17 p-value</b> | <b>P21 p-value</b> |
|--------------------|-------------------|--------------------|--------------------|--------------------|--------------------|
| Stat3              | 0.4346            | 0.3857             | 0.0327             | 0.9547             | 0.5008             |
| Cd180              | 0.9367            | 0.4480             | 0.5559             | 0.0073             | 0.6172             |
| Irf1               | 0.9086            | 0.4999             | 0.5525             | 0.1686             | 0.0263             |
| Prkcd              | 0.4486            | 0.8090             | 0.0293             | 0.3174             | 0.8335             |
| Fcgr1              | 0.2440            | 0.3014             | 0.0088             | 0.1594             | 0.1958             |
| Map2k3             | 0.9119            | 0.0511             | 0.1084             | 0.0481             | 0.4648             |
| Ap3d1              | 0.7036            | 0.2549             | 0.0648             | 0.0024             | 0.0528             |
| Dbnl               | 0.2470            | 0.6262             | 0.1454             | 0.0158             | 0.1484             |
| Hmgb3              | 0.6391            | 0.3573             | 0.0746             | 0.4304             | 0.6863             |
| Cd1d1              | 0.5980            | 0.4529             | 0.0883             | 0.0352             | 0.0154             |
| Pcgf4              | 0.2212            | 0.3958             | 0.3913             | 0.0141             | 0.9282             |
| Cdkn1a             | 0.1058            | 0.2996             | 0.5245             | 0.3156             | 0.0385             |
| Lyzs               | 0.7204            | 0.2137             | 0.0037             | 0.3757             | 0.6937             |
| Rac1               | 0.9086            | 0.3243             | 0.0692             | 0.0168             | 0.0062             |
| C1qa               | 0.8257            | 0.0232             | 0.7958             | 0.2138             | 0.6524             |
| C1qg               | 0.7464            | 0.1464             | 0.0374             | 0.1246             | 0.1000             |
| C1qb               | 0.4399            | 0.2442             | 0.0112             | 0.1305             | 0.1597             |
| Ly86               | 0.1034            | 0.5989             | 0.1462             | 0.0509             | 0.0203             |
| Tnfsf12            | 0.7563            | 0.4325             | 0.1072             | 0.0135             | 0.0061             |
| Cxcl12             | 0.8329            | 0.0127             | 0.1037             | 0.6398             | 0.0069             |
| Impdh1             | 0.9752            | 0.1448             | 0.5139             | 0.1853             | 0.0063             |
| Pla2g7             | 0.1216            | 0.2429             | 0.0683             | 0.0292             | 0.0175             |
| Lpin1              | 0.9379            | 0.3008             | 0.0185             | 0.1747             | 0.1224             |
| Stab1              | 0.0100            | 0.7101             | 0.3791             | 0.7389             | 0.5969             |
| Cfhrb_4/2          | 0.9299            | 0.1295             | 0.1532             | 0.1398             | 0.0372             |
| Cfh                | 0.8211            | 0.2509             | 0.5460             | 0.0436             | 0.1795             |
| Chst2              | 0.8469            | 0.2410             | 0.1290             | 0.0617             | 0.0083             |
| Il11ra1            | 0.7325            | 0.2395             | 0.0046             | 0.2238             | 0.4392             |
| Tollip             | 0.9715            | 0.0252             | 0.0871             | 0.6594             | 0.7990             |
| Cxcl14             | 0.9017            | 0.1481             | 0.8161             | 0.2785             | 0.0405             |
| Ccl9               | 0.6898            | 0.7827             | 0.0834             | 0.0467             | 0.0295             |
| Gbp2               | 0.5407            | 0.5249             | 0.0399             | 0.0363             | 0.0320             |
| H2-D1              | 0.2431            | 0.0922             | 0.0660             | 0.0029             | 0.0915             |
| H2-K1              | 0.3356            | 0.1459             | 0.0319             | 0.0113             | 0.0886             |
| Ifit3              | 0.8724            | 0.0160             | 0.0227             | 0.0058             | 0.0712             |
| H2-D1              | 0.2390            | 0.2797             | 0.0459             | 0.0367             | 0.2148             |
| Gbp4               | 0.8987            | 0.4631             | 0.0500             | 0.0194             | 0.4913             |
| Prkcq              | 0.4694            | 0.5644             | 0.1492             | 0.0035             | 0.1405             |
| Serping1           | 0.9347            | 0.1191             | 0.0160             | 0.1507             | 0.0205             |
| Ifit1              | 0.3805            | 0.4309             | 0.0774             | 0.0252             | 0.2955             |
| Isgf3g             | 0.8009            | 0.3293             | 0.0124             | 0.0026             | 0.1165             |
| Ifit2              | 0.7013            | 0.8934             | 0.1616             | 0.0591             | 0.0229             |
| Tac1               | 0.5672            | 0.9105             | 0.2208             | 0.0045             | 0.1318             |
| B2m                | 0.6678            | 0.2936             | 0.0605             | 0.0256             | 0.1294             |
| C4                 | 0.8409            | 0.7056             | 0.0092             | 0.0075             | 0.0100             |
| C3                 | 0.7364            | 0.5236             | 0.0186             | 0.2927             | 0.0497             |
| Il18               | 0.9207            | 0.7989             | 0.0201             | 0.1710             | 0.0434             |

|          |        |        |        |        |        |
|----------|--------|--------|--------|--------|--------|
| Dfy      | 0.0123 | 0.9648 | 0.6440 | 0.6401 | 0.6968 |
| Slc3a2   | 0.8202 | 0.0158 | 0.1588 | 0.6703 | 0.0217 |
| H2-T10   | 0.9726 | 0.0280 | 0.2125 | 0.2824 | 0.1049 |
| Egr1     | 0.9434 | 0.0099 | 0.4234 | 0.6368 | 0.5783 |
| Cebpb    | 0.7804 | 0.8789 | 0.3930 | 0.8031 | 0.8066 |
| H2-T22   | 0.0143 | 0.0896 | 0.5029 | 0.2072 | 0.8251 |
| Bst1     | 0.4363 | 0.8218 | 0.9687 | 0.0220 | 0.2658 |
| Tacstd2  | 0.6855 | 0.5256 | 0.8097 | 0.0314 | 0.6530 |
| C1r      | 0.6308 | 0.5316 | 0.0175 | 0.9392 | 0.8310 |
| Traf3ip2 | 0.7118 | 0.4518 | 0.0469 | 0.1806 | 0.0046 |
| Prkca    | 0.9819 | 0.1218 | 0.8567 | 0.7753 | 0.0103 |
