# Supplementary material
Source: PubMed Central journal article supplement (PMC1885545)
Supplement: NIHMS15440-supplement-03.pdf [file NIHMS15440-supplement-03.pdf]

**Supplemental Data 3. Difference in Expression [fold change] between age-matched samples**

| <b>Gene Symbol</b> | <b>P6 Fold Change</b> | <b>P10 Fold Change</b> | <b>P14 Fold Change</b> | <b>P17 Fold Change</b> | <b>P21 Fold Change</b> |
|--------------------|-----------------------|------------------------|------------------------|------------------------|------------------------|
| Stat3              | -1.0389               | 1.6229                 | 3.6969                 | 1.9371                 | 1.0731                 |
| Cd180              | -1.0134               | 1.0356                 | -1.0777                | 1.1930                 | -1.1086                |
| Irf1               | 1.2389                | 1.2704                 | 1.7826                 | 1.7545                 | 1.3396                 |
| Prkcd              | -1.1398               | -1.0647                | -1.2117                | -1.1638                | 1.0269                 |
| Fcgr1              | -1.0128               | 1.0510                 | 1.2226                 | 1.3194                 | 1.3916                 |
| Map2k3             | 1.0234                | 1.0901                 | 1.1658                 | 1.8373                 | 1.3353                 |
| Ap3d1              | -1.0046               | 1.2731                 | 1.4613                 | 1.3685                 | 1.2179                 |
| Dbnl               | -1.1137               | -1.1780                | -2.2850                | -3.0908                | -3.1236                |
| Hmgb3              | 1.0066                | 1.1188                 | 1.0179                 | -1.0378                | 1.0998                 |
| Cd1d1              | 1.0195                | 1.1038                 | 1.0785                 | 1.3900                 | 1.3237                 |
| Pcgf4              | -1.0608               | 1.5429                 | 1.9834                 | 1.6806                 | 1.7131                 |
| Cdkn1a             | -1.2400               | 1.0190                 | 1.3580                 | 1.4432                 | 2.6709                 |
| Lyzs               | 1.0189                | -1.0299                | 1.1519                 | 1.1906                 | 1.3383                 |
| Rac1               | 1.0962                | 1.1300                 | 1.4068                 | 1.1577                 | 1.1083                 |
| C1qa               | -1.0478               | 1.1244                 | 2.9077                 | 2.1589                 | 2.2138                 |
| C1qg               | -1.0238               | 1.2107                 | 1.4804                 | 1.3904                 | 1.0883                 |
| C1qb               | -1.3259               | -1.1909                | 1.3476                 | 1.7365                 | 1.6312                 |
| Ly86               | 1.0453                | 1.1480                 | 1.4434                 | 1.3625                 | 1.3222                 |
| Tnfsf12            | -1.0640               | 1.0305                 | 1.3995                 | 2.1249                 | 1.6657                 |
| Cxcl12             | 1.1028                | 1.4864                 | -1.0420                | 1.2215                 | -1.0376                |
| Impdh1             | 1.2126                | -1.0475                | 1.0158                 | -1.1118                | -1.2309                |
| Pla2g7             | 1.0834                | -1.0201                | 1.8560                 | 1.8269                 | 1.9122                 |
| Lpin1              | 1.1654                | -1.0780                | 1.3584                 | 1.2776                 | 1.2667                 |
| Stab1              | 1.0530                | -1.0177                | 1.1468                 | 1.1750                 | 1.0183                 |
| Cfhrb_4/2          | 1.1347                | 1.2002                 | 1.7059                 | 1.4266                 | 1.8223                 |
| Cfh                | -1.0118               | 1.1050                 | 1.3089                 | 1.0861                 | 1.3499                 |
| Chst2              | -1.0067               | 1.2683                 | 1.2220                 | 1.1068                 | 1.0287                 |
| Il11ra1            | -1.0081               | 1.4343                 | 3.0445                 | 2.0300                 | 1.4803                 |
| Tollip             | 1.1163                | 2.2699                 | 3.1355                 | 2.0551                 | 1.6299                 |
| Cxcl14             | -1.1961               | 1.3556                 | 3.0243                 | 2.6770                 | 2.1111                 |
| Ccl9               | 1.1052                | 1.3727                 | 2.3687                 | 1.8284                 | 1.4884                 |
| Gbp2               | 1.0156                | 1.1063                 | 1.1999                 | 1.1349                 | 1.0622                 |
| H2-D1              | -1.0733               | 1.1458                 | 1.6232                 | 1.3655                 | 1.2898                 |
| H2-K1              | -1.3217               | -1.0861                | 1.0922                 | 1.1756                 | 1.0267                 |
| Ifit3              | 1.1190                | 1.1209                 | 1.3355                 | 1.3085                 | 1.2317                 |
| H2-D1              | -1.0584               | 1.0692                 | 1.3095                 | 1.1660                 | 1.1070                 |
| Gbp4               | -1.1001               | 1.2304                 | -1.4266                | -2.6000                | -2.7744                |
| Prkcq              | 1.0438                | 2.1070                 | 3.5118                 | 3.5057                 | 2.6960                 |
| Serping1           | -1.0892               | 1.1008                 | 2.2875                 | 1.7487                 | 1.5072                 |
| Ifit1              | 1.1779                | 1.1508                 | 1.1911                 | 1.2027                 | 1.3413                 |
| Isgf3g             | 1.0126                | 1.0422                 | 1.2007                 | 1.2305                 | 1.4075                 |
| Ifit2              | 1.1237                | -1.1439                | 1.1552                 | -1.0189                | 1.0413                 |
| Tac1               | 1.0759                | 1.0422                 | 1.0897                 | 1.1981                 | 1.1027                 |
| B2m                | -1.1872               | 1.6388                 | 4.7040                 | 3.4851                 | 2.0427                 |
| C4                 | 1.0200                | 1.1044                 | 1.4567                 | 1.1843                 | 1.2591                 |
| C3                 | 1.0395                | -1.1022                | 1.0930                 | 1.0769                 | 1.2194                 |

|          |         |         |         |         |         |
|----------|---------|---------|---------|---------|---------|
| Il18     | 1.0849  | -1.0275 | 1.2648  | -1.0273 | -1.0934 |
| Dfy      | -1.0215 | 1.4819  | 1.0747  | 1.2396  | 1.3851  |
| Slc3a2   | 1.1260  | 1.3512  | 2.1555  | 1.6810  | 1.5241  |
| H2-T10   | 1.0942  | 1.1756  | 1.7037  | 1.3861  | 1.2326  |
| Egr1     | -1.1099 | -1.0141 | -1.0852 | 1.5079  | 1.3430  |
| Cebpb    | -1.0106 | 1.3137  | -1.4705 | -2.9359 | -4.2981 |
| H2-T22   | 1.0368  | 1.0445  | 1.0221  | 1.1125  | 1.0265  |
| Bst1     | 1.0186  | 1.4915  | 3.8437  | 2.0385  | 1.4901  |
| Tacstd2  | 1.0052  | 1.3512  | 1.0789  | -1.5628 | -1.4868 |
| C1r      | -1.0155 | 1.1991  | 2.0782  | 2.1181  | 2.1005  |
| Traf3ip2 | 1.1088  | 1.2095  | 1.3287  | -1.0033 | 1.0656  |
| Prkca    | -1.0298 | 1.2705  | 1.2668  | 1.1803  | 1.2901  |
