# Supplementary material
Source: PubMed Central journal article supplement (PMC1885545)
Supplement: NIHMS15440-supplement-04.pdf [file NIHMS15440-supplement-04.pdf]

**Supplemental Data 4: Most Specific GO Biological Process Term per Gene**

| <b>Affymetrix ID</b> | <b>GO ID</b>             | <b>GO Term</b>                                                  | <b>p-value</b> |
|----------------------|--------------------------|-----------------------------------------------------------------|----------------|
| 99099_at             | GO:0007259               | JAK-STAT cascade                                                | 0.0358529      |
| 100730_at            | GO:0006955               | immune response                                                 | 3.44E-13       |
| 102401_at            | GO:0045893               | positive regulation of transcription, DNA-dependent             | 0.1986299      |
| 104531_at            | GO:0042100               | B cell proliferation                                            | 0.0133264      |
| 102879_s_at          | GO:0050776               | regulation of immune response                                   | 0.0226872      |
| 93315_at             | GO:0042035               | regulation of cytokine biosynthesis                             | 0.0416229      |
| 96185_at             | GO:0051138               | positive regulation of NK T cell differentiation                | 0.0002099      |
| 95529_at             | GO:0051017               | actin filament bundle formation                                 | 0.1493277      |
| 98038_at             | GO:0045638               | negative regulation of myeloid cell differentiation             | 0.1493277      |
| 103422_at            | GO:0051138               | positive regulation of NK T cell differentiation                | 0.0168579      |
| 101475_at            | GO:0006959               | humoral immune response                                         | 9.84E-09       |
| 94881_at             | GO:0045736               | negative regulation of cyclin dependent protein kinase activity | 0.0084641      |
| 100611_at            | GO:0042742               | defense response to bacteria                                    | 0.4911458      |
| 101555_at            | GO:0030838               | positive regulation of actin filament polymerization            | 3.46E-58       |
| 98562_at             | GO:0006958               | complement activation, classical pathway                        | 0.0014377      |
| 92223_at             | GO:0006958               | complement activation, classical pathway                        | 0.0014377      |
| 96020_at             | GO:0006958               | complement activation, classical pathway                        | 0.0014377      |
| 94425_at             | GO:0006955               | immune response                                                 | 3.44E-13       |
| 93917_at             | GO:0030154               | cell differentiation                                            | 0.0109693      |
| 160511_at            | GO:0050930               | induction of positive chemotaxis                                | 4.31E-05       |
| 98390_at             | GO:0046651               | lymphocyte proliferation                                        | 1.17E-08       |
| 101923_at            | GO:0016042               | lipid catabolism                                                | 0.1047075      |
| 98892_at             | GO:0045598               | regulation of fat cell differentiation                          | 0.0407207      |
| 96886_at             | GO:0007155               | cell adhesion                                                   | 0.4434236      |
| 94993_f_at           | GO:0006957               | complement activation, alternative pathway                      | 2.84E-09       |
| 101853_f_at          | GO:0006957               | complement activation, alternative pathway                      | 2.84E-09       |
| 102639_at            | GO:0006954               | inflammatory response                                           | 0.156549       |
| 93874_s_at           | GO:0007166               | cell surface receptor linked signal transduction                | 0.2530902      |
| 160809_at            | GO:0006955               | immune response                                                 | 3.44E-13       |
| 96953_at             | GO:0006955               | immune response                                                 | 3.44E-13       |
| 104388_at            | GO:0007600               | sensory perception                                              | 0.2828597      |
| 104597_at            | GO:0006955               | immune response                                                 | 3.44E-13       |
| 97540_f_at           | GO:0019885               | antigen processing, endogenous antigen via MHC class I          | 0.0003588      |
| 93120_f_at           | GO:0019885               | antigen processing, endogenous antigen via MHC class I          | 0.0003588      |
| 93956_at             | GO:0006955               | immune response                                                 | 3.44E-13       |
| 97541_f_at           | GO:0019885               | antigen processing, endogenous antigen via MHC class I          | 0.0003588      |
| 103202_at            | GO:0006955               | immune response                                                 | 3.44E-13       |
| 104431_at            | GO:0050870               | positive regulation of T cell activation                        | 0.0416229      |
| 99081_at             | GO:0007596               | blood coagulation                                               | 0.0011052      |
| 100981_at            | GO:0006955               | immune response                                                 | 3.44E-13       |
| 103634_at            | GO:0045351               | interferon type I biosynthesis                                  | 2.84E-08       |
| 103639_at            | GO:0006955               | immune response                                                 | 3.44E-13       |
| 102726_at            | GO:0048265               | response to pain                                                | 0.0334368      |
| 93088_at             | GO:0019885               | antigen processing, endogenous antigen via MHC class I          | 0.0003588      |
| 103033_at            | No Information Available |                                                                 |                |
| 93497_at             | GO:0050766               | positive regulation of phagocytosis                             | 0.0036843      |
| 102802_at            | GO:0006955               | immune response                                                 | 3.44E-13       |

|             |            |                                                      |           |
|-------------|------------|------------------------------------------------------|-----------|
| 93412_at    | GO:0007186 | G-protein coupled receptor protein signaling pathway | 0.4454595 |
| 99133_at    | GO:0006952 | defense response                                     | 2.74E-18  |
| 101876_s_at | GO:0006952 | defense response                                     | 2.74E-18  |
| 98579_at    | GO:0030217 | T cell differentiation                               | 0.1047075 |
| 92925_at    | GO:0045444 | fat cell differentiation                             | 0.0416229 |
| 93865_s_at  | GO:0006952 | defense response                                     | 2.74E-18  |
| 103759_at   | GO:0006952 | defense response                                     | 2.74E-18  |
| 103648_at   | GO:0006952 | defense response                                     | 2.74E-18  |
| 95415_f_at  | GO:0006958 | complement activation, classical pathway             | 0.0014377 |
| 96221_at    | GO:0048305 | immunoglobulin secretion                             | 0.025182  |
| 102299_at   | GO:0050930 | induction of positive chemotaxis                     | 0.0334368 |
